# Supplementary material for: In Vitro Activity and Clinical Outcomes of Clofazimine for Nontuberculous Mycobacteria Pulmonary Disease
Source: MDPI journal article supplement (doi:10.3390/jcm10194581), 2021-10-03
Supplement: s1 [file s1]

[Supplement data]

***In vitro* activity and clinical outcomes of clofazimine for nontuberculous  
mycobacteria pulmonary disease**

Dae Hun Kim<sup>1,\*</sup>, Bo-Guen Kim<sup>1,\*</sup>, Su-Young Kim<sup>1</sup>, Hee Jae Huh<sup>2</sup>, Nam Yong Lee<sup>2</sup>,

Won-Jung Koh<sup>1,†</sup>, Hojoong Kim<sup>1</sup>, O Jung Kwon<sup>1</sup>, Byung Woo Jhun<sup>1</sup>

<sup>1</sup>Division of Pulmonary and Critical Care Medicine, Department of Medicine,  
Samsung Medical Center, Sungkyunkwan University School of Medicine, Seoul,  
South Korea. <sup>2</sup>Department of Laboratory Medicine and Genetics, Samsung Medical  
Center, Sungkyunkwan University School of Medicine, Seoul, South Korea.

\*These authors contributed equally to this work

†Deceased

**Supplementary Table S1** Companion drugs used with clofazimine

| Variables                                                                       | Number (%) |
|---------------------------------------------------------------------------------|------------|
| <i>M. abscessus</i> (n=27)                                                      |            |
| Companion drugs used with clofazimine                                           |            |
| Azithromycin                                                                    | 27 (100)   |
| Amikacin injection                                                              | 23 (85)    |
| Inhaled amikacin                                                                | 23 (85)    |
| Imipenem                                                                        | 21 (78)    |
| Tigecycline                                                                     | 9 (33)     |
| Linezolid                                                                       | 7 (26)     |
| Cefoxitin                                                                       | 6 (22)     |
| Ethambutol                                                                      | 2 (7)      |
| Rifamycin                                                                       | 2 (7)      |
| <i>M. massiliense</i> (n=9)                                                     |            |
| Companion drugs used with clofazimine                                           |            |
| Azithromycin                                                                    | 9 (100)    |
| Inhaled amikacin                                                                | 9 (100)    |
| Amikacin injection                                                              | 6 (67)     |
| Imipenem                                                                        | 4 (44)     |
| Cefoxitin                                                                       | 1 (11)     |
| <i>M. avium</i> (n=1)                                                           |            |
| Azithromycin                                                                    | 1 (100)    |
| Ethambutol                                                                      | 1 (100)    |
| Moxifloxacin                                                                    | 1 (100)    |
| <i>M. intracellulare</i> (n=1)                                                  |            |
| Azithromycin                                                                    | 1 (100)    |
| Ethambutol                                                                      | 1 (100)    |
| Inhaled amikacin                                                                | 1 (100)    |
| Drug-resistant <i>M. abscessus</i> or <i>M. massiliense</i> (n=14) <sup>¶</sup> |            |
| Azithromycin                                                                    | 14 (100)   |
| Inhaled amikacin                                                                | 10 (71)    |
| Amikacin injection                                                              | 9 (64)     |
| Imipenem                                                                        | 7 (50)     |
| Linezolid                                                                       | 7 (50)     |
| Cefoxitin                                                                       | 5 (36)     |
| Tigecycline                                                                     | 2 (14)     |
| Drug-resistant <i>M. intracellulare</i> or <i>M. avium</i> (n = 6) <sup>¶</sup> |            |
| Ethambutol                                                                      | 6 (100)    |
| Azithromycin                                                                    | 5 (83)     |
| Inhaled amikacin                                                                | 5 (83)     |
| Rifamycin                                                                       | 3 (50)     |
| Linezolid                                                                       | 2 (33)     |

|                    |        |
|--------------------|--------|
| Amikacin injection | 1 (17) |
| Cefoxitin          | 1 (17) |
| Imipenem           | 1 (17) |
| Tigecycline        | 1 (17) |
| Isoniazid          | 1 (17) |
| Moxifloxacin       | 1 (17) |

---

<sup>¶</sup>Strains resistant to macrolide or aminoglycoside or both.

**Supplementary Table S2** Factors associated with culture conversion in patients treated with clofazimine-containing regimens (n=58)

| Variable                                | Univariable                 |                | Multivariable               |                |
|-----------------------------------------|-----------------------------|----------------|-----------------------------|----------------|
|                                         | Unadjusted HR<br>(95% CI)   | <i>p</i> value | Adjusted HR<br>(95% CI)     | <i>p</i> value |
| Age <65 years                           | 1.510 (0.590-3.863)         | 0.390          | 1.129 (0.381-3.345)         | 0.826          |
| Female                                  | 0.431 (0.146-1.275)         | 0.128          | -                           | -              |
| Body mass index ≥18.5 kg/m <sup>2</sup> | 0.818 (0.334-2.008)         | 0.662          | 0.869 (0.275-2.750)         | 0.812          |
| Never smoker                            | 1.706 (0.577-5.044)         | 0.334          | -                           | -              |
| No previous pulmonary tuberculosis      | 1.310 (0.566-3.032)         | 0.529          | 1.626 (0.530-4.993)         | 0.396          |
| Etiology                                |                             |                |                             |                |
| <i>M. abscessus</i>                     | Reference                   |                | Reference                   |                |
| <i>M. massiliense</i>                   | 3.143 (1.297-7.618)         | 0.011          | 2.130 (0.439-10.342)        | 0.348          |
| MAC                                     | 0.846 (0.185-3.864)         | 0.830          | 0.221 (0.022-2.215)         | 0.199          |
| Negative sputum acid-fast bacilli smear | 2.007 (0.0855-4.712)        | 0.110          | 1.103 (0.388-3.140)         | 0.854          |
| <b>No cavity</b>                        | <b>0.977 (0.410-2.331)</b>  | <b>0.958</b>   | <b>4.273 (1.009-18.089)</b> | <b>0.049</b>   |
| MIC of clofazimine, µg/ml               |                             |                |                             |                |
| ≥0.5                                    | Reference                   |                | Reference                   |                |
| ≤0.25                                   | 2.001 (0.815-4.914)         | 0.130          | 2.545 (0.587-11.031)        | 0.212          |
| Macrolide resistance                    |                             |                |                             |                |
| Resistant                               | Reference                   |                | Reference                   |                |
| Inducible resistance                    | 1.665 (0.430-6.440)         | 0.460          | 2.775 (0.332-23.160)        | 0.346          |
| <b>Susceptible</b>                      | <b>4.582 (1.287-16.312)</b> | <b>0.019</b>   | <b>7.515 (1.164-48.512)</b> | <b>0.034</b>   |
| Intravenous amikacin use, days          | 0.983 (0.958-1.009)         | 0.195          | 0.874 (0.938-1.011)         | 0.163          |

|                                          |                     |       |                     |       |
|------------------------------------------|---------------------|-------|---------------------|-------|
| Elevated erythrocyte sedimentation rate* | 0.481 (0.112-2.061) | 0.324 | 0.896 (0.173-4.638) | 0.896 |
|------------------------------------------|---------------------|-------|---------------------|-------|

HR, hazard ratio; CI, confidential interval; MAC, *Mycobacterium avium* complex; MIC, minimum inhibitory concentration.

\*Erythrocyte sedimentation rate >15 mm/h (men) or >20 mm/h (women).
