# Supplementary material for: In Vitro Activity and Clinical Outcomes of Clofazimine for Nontuberculous Mycobacteria Pulmonary Disease
Source: MDPI journal article supplement (doi:10.3390/jcm10194581), 2021-10-03
Supplement: s1 [file s1]

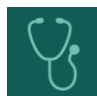

## Supplement data

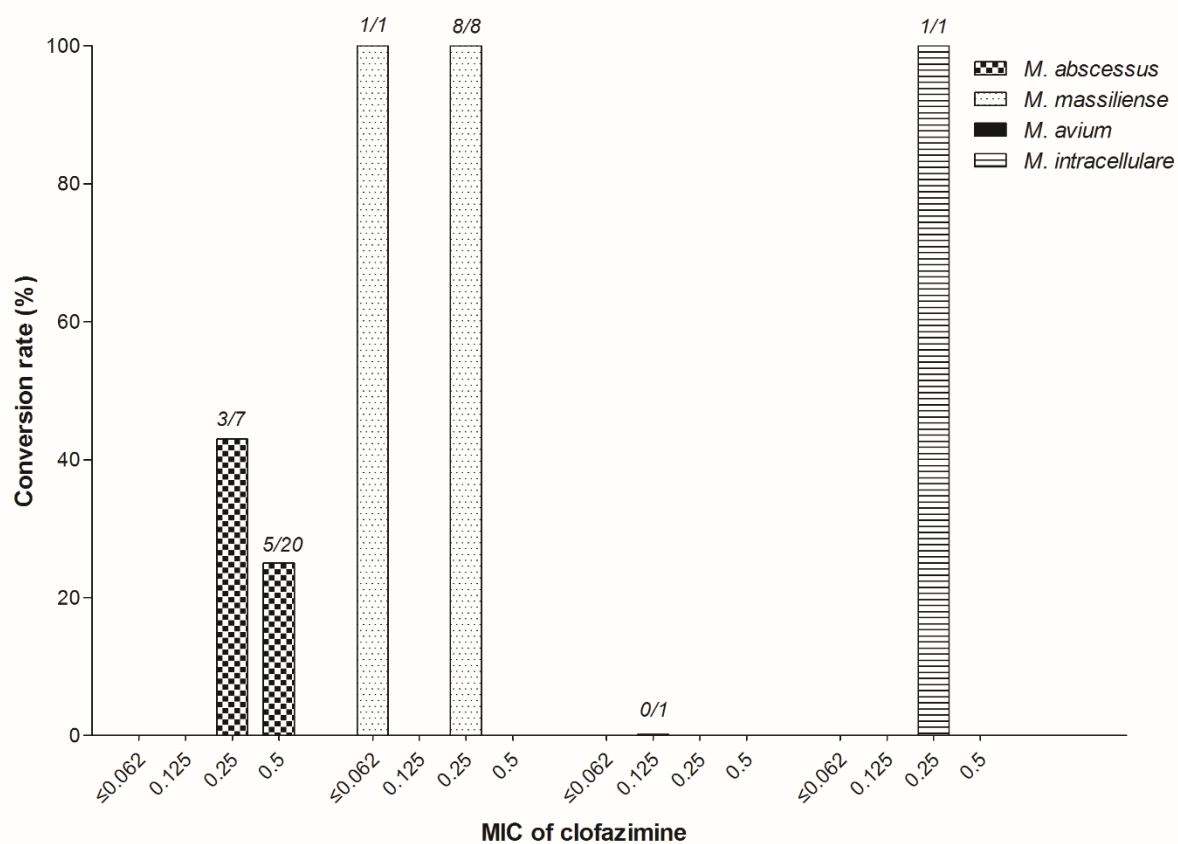

**Figure S1.** Culture conversion rate after 12 months of treatment in NTM-PD patients without drug-resistant isolates according to MIC value of clofazimine and NTM species (n=38).

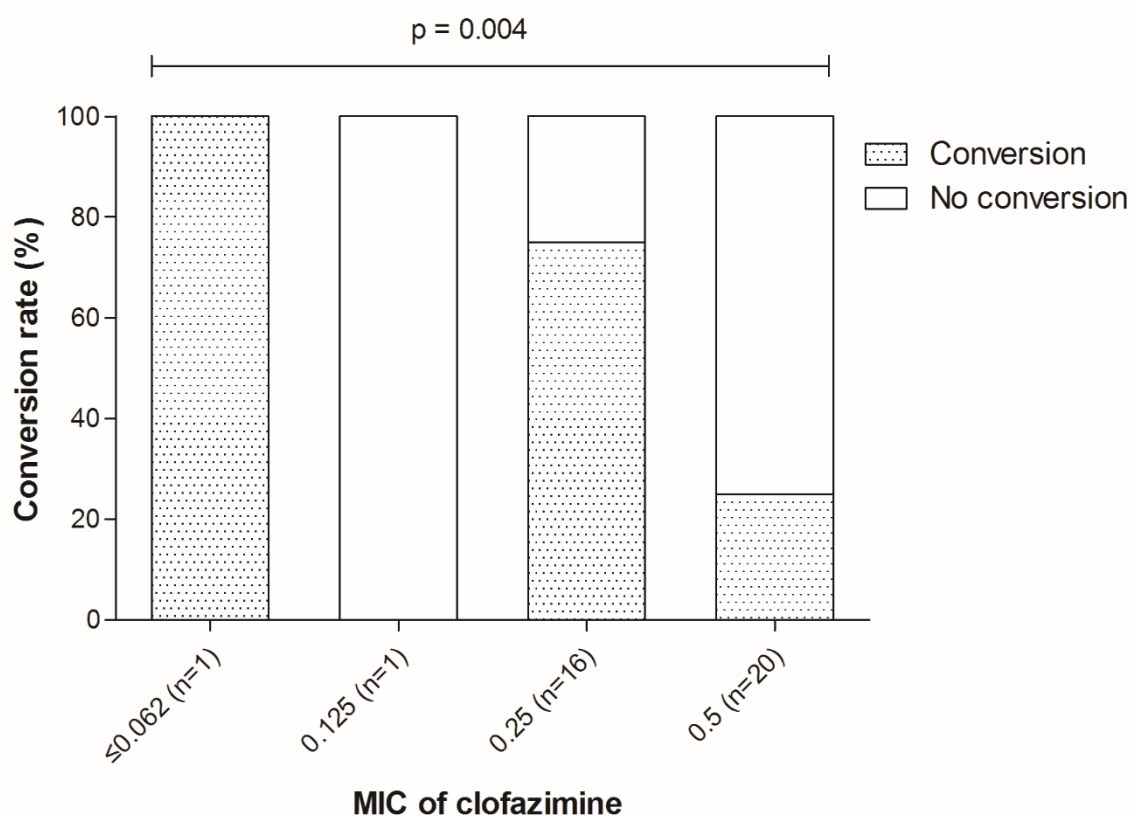

**Figure S2. A** Culture conversion rate after 12 months of treatment in NTM-PD patients without drug-resistant isolates according to MIC value of clofazimine, regardless of NTM species (n=38).

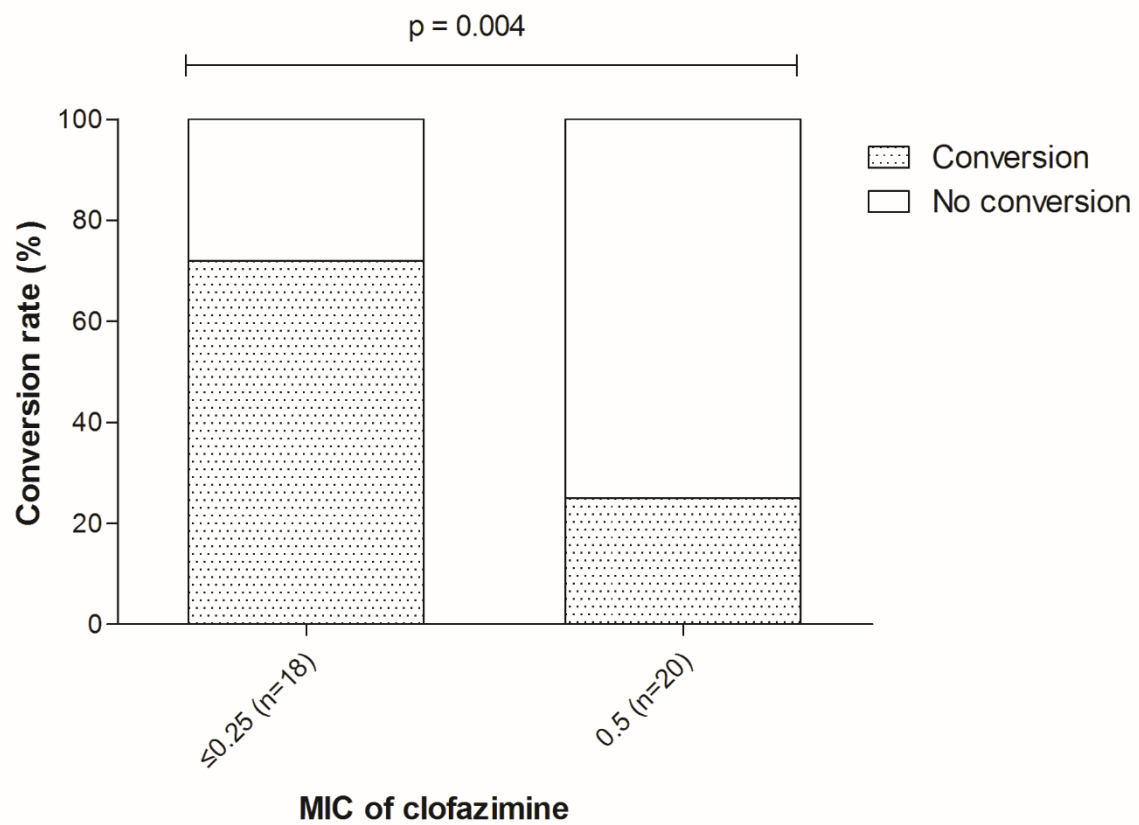

**Figure S2. B** Culture conversion rate after 12 months of treatment in NTM-PD patients without drug-resistant isolates according to clofazimine MIC of 0.25 µg/ml, regardless of NTM species (n=38).

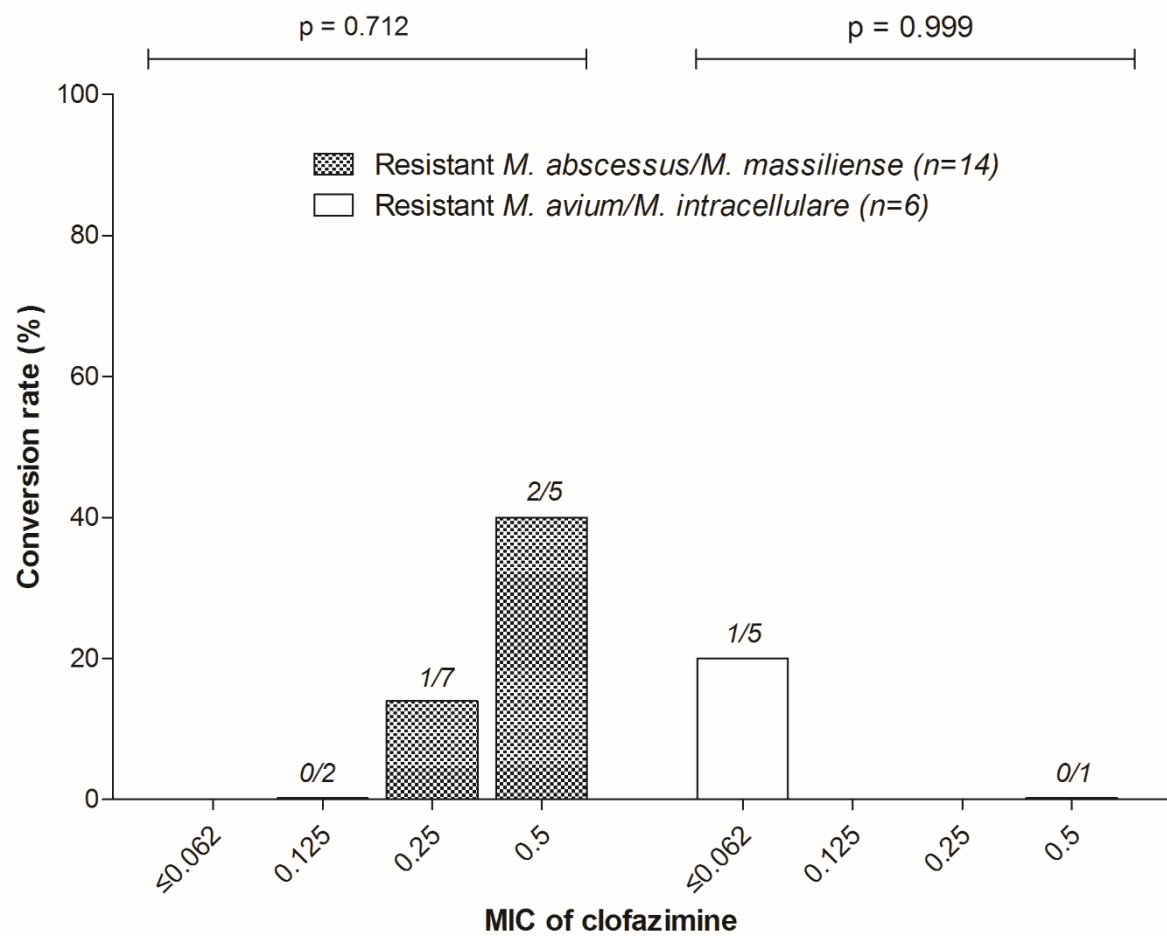

Figure S3. Culture conversion rate after 12 months of treatment in NTM-PD patients with drug-resistant isolates (n=20).

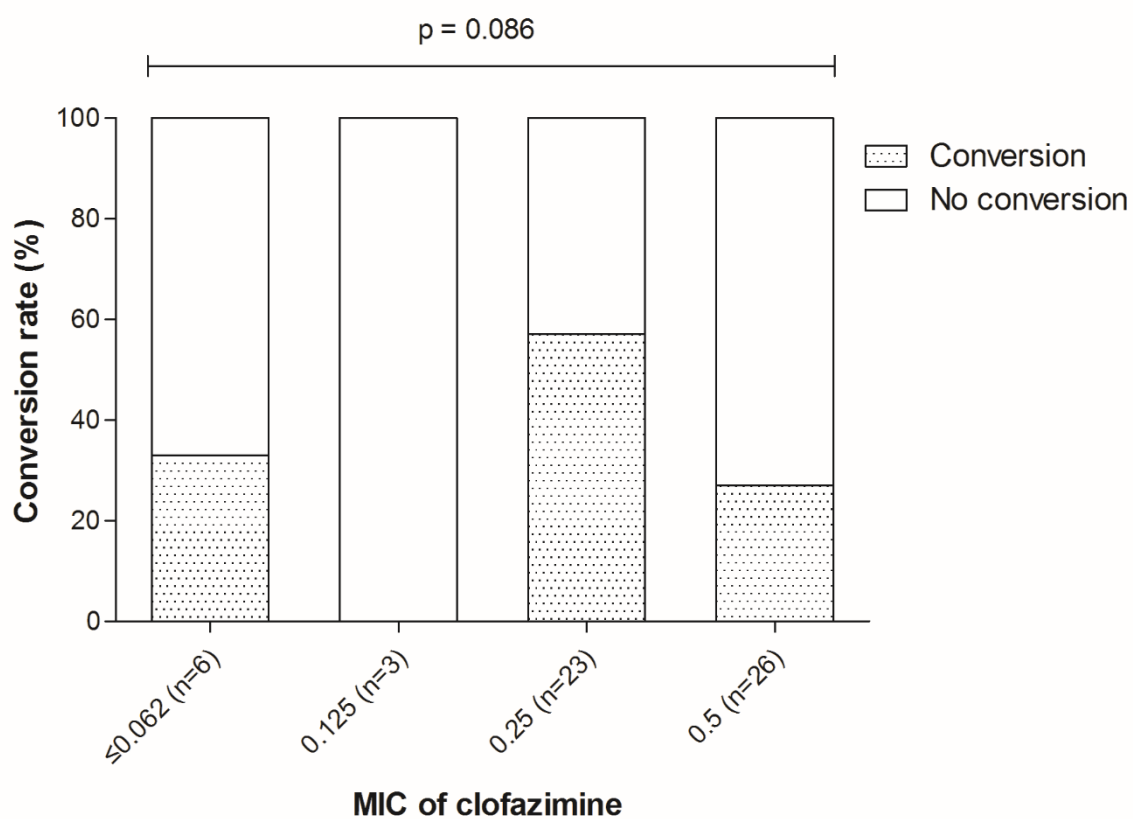

**Figure S4. A** Culture conversion rate after 12 months of treatment in all study patients according to MIC value of clofazimine, regardless of NTM species (n=58).

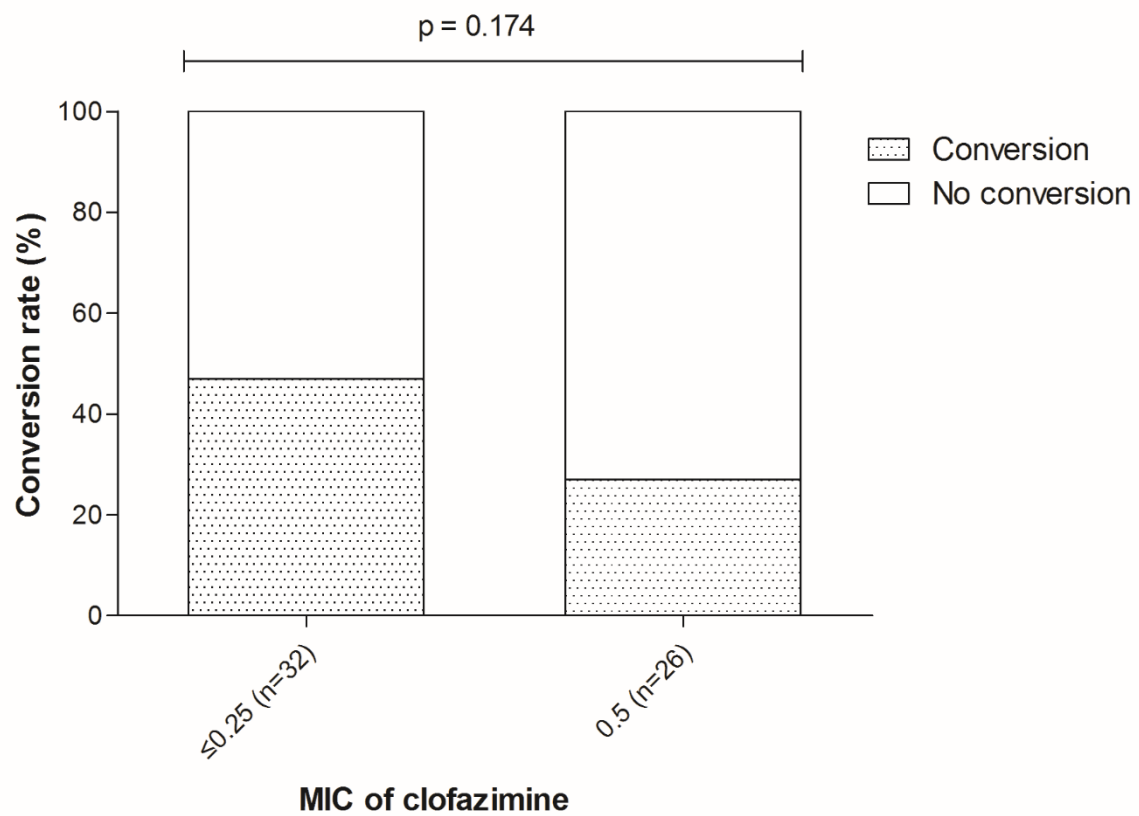

**Figure S4. B** Culture conversion rate after 12 months of treatment in all study patients according to clofazimine MIC of 0.25  $\mu\text{g/ml}$ , regardless of NTM species (n=58).

**Table S1.** Companion drugs used with clofazimine.

| Variables                                                                       | Number (%) |
|---------------------------------------------------------------------------------|------------|
| <i>M. abscessus</i> (n=27)                                                      |            |
| Companion drugs used with clofazimine                                           |            |
| Azithromycin                                                                    | 27 (100)   |
| Amikacin injection                                                              | 23 (85)    |
| Inhaled amikacin                                                                | 23 (85)    |
| Imipenem                                                                        | 21 (78)    |
| Tigecycline                                                                     | 9 (33)     |
| Linezolid                                                                       | 7 (26)     |
| Cefoxitin                                                                       | 6 (22)     |
| Ethambutol                                                                      | 2 (7)      |
| Rifamycin                                                                       | 2 (7)      |
| <i>M. massiliense</i> (n=9)                                                     |            |
| Companion drugs used with clofazimine                                           |            |
| Azithromycin                                                                    | 9 (100)    |
| Inhaled amikacin                                                                | 9 (100)    |
| Amikacin injection                                                              | 6 (67)     |
| Imipenem                                                                        | 4 (44)     |
| Cefoxitin                                                                       | 1 (11)     |
| <i>M. avium</i> (n=1)                                                           |            |
| Azithromycin                                                                    | 1 (100)    |
| Ethambutol                                                                      | 1 (100)    |
| Moxifloxacin                                                                    | 1 (100)    |
| <i>M. intracellulare</i> (n=1)                                                  |            |
| Azithromycin                                                                    | 1 (100)    |
| Ethambutol                                                                      | 1 (100)    |
| Inhaled amikacin                                                                | 1 (100)    |
| Drug-resistant <i>M. abscessus</i> or <i>M. massiliense</i> (n=14) <sup>‡</sup> |            |
| Azithromycin                                                                    | 14 (100)   |
| Inhaled amikacin                                                                | 10 (71)    |
| Amikacin injection                                                              | 9 (64)     |
| Imipenem                                                                        | 7 (50)     |
| Linezolid                                                                       | 7 (50)     |
| Cefoxitin                                                                       | 5 (36)     |
| Tigecycline                                                                     | 2 (14)     |
| Drug-resistant <i>M. intracellulare</i> or <i>M. avium</i> (n=6) <sup>‡</sup>   |            |
| Ethambutol                                                                      | 6 (100)    |
| Azithromycin                                                                    | 5 (83)     |
| Inhaled amikacin                                                                | 5 (83)     |
| Rifamycin                                                                       | 3 (50)     |
| Linezolid                                                                       | 2 (33)     |
| Amikacin injection                                                              | 1 (17)     |
| Cefoxitin                                                                       | 1 (17)     |
| Imipenem                                                                        | 1 (17)     |
| Tigecycline                                                                     | 1 (17)     |
| Isoniazid                                                                       | 1 (17)     |
| Moxifloxacin                                                                    | 1 (17)     |

<sup>‡</sup>Strains resistant to macrolide or aminoglycoside or both.

**Table S2.** Factors associated with culture conversion in patients treated with clofazimine-containing regimens (n=58).

| Variable                                 | Univariable                 |              | Multivariable               |              |
|------------------------------------------|-----------------------------|--------------|-----------------------------|--------------|
|                                          | Unadjusted HR<br>(95% CI)   | p value      | Adjusted HR<br>(95% CI)     | p value      |
| Age <65 years                            | 1.510 (0.590-3.863)         | 0.390        | 1.129 (0.381-3.345)         | 0.826        |
| Female                                   | 0.431 (0.146-1.275)         | 0.128        | -                           | -            |
| Body mass index ≥18.5 kg/m <sup>2</sup>  | 0.818 (0.334-2.008)         | 0.662        | 0.869 (0.275-2.750)         | 0.812        |
| Never smoker                             | 1.706 (0.577-5.044)         | 0.334        | -                           | -            |
| No previous pulmonary tuberculosis       | 1.310 (0.566-3.032)         | 0.529        | 1.626 (0.530-4.993)         | 0.396        |
| Etiology                                 |                             |              |                             |              |
| <i>M. abscessus</i>                      | Reference                   |              | Reference                   |              |
| <i>M. massiliense</i>                    | 3.143 (1.297-7.618)         | 0.011        | 2.130 (0.439-10.342)        | 0.348        |
| MAC                                      | 0.846 (0.185-3.864)         | 0.830        | 0.221 (0.022-2.215)         | 0.199        |
| Negative sputum acid-fast bacilli smear  | 2.007 (0.0855-4.712)        | 0.110        | 1.103 (0.388-3.140)         | 0.854        |
| <b>No cavity</b>                         | <b>0.977 (0.410-2.331)</b>  | <b>0.958</b> | <b>4.273 (1.009-18.089)</b> | <b>0.049</b> |
| MIC of clofazimine, µg/ml                |                             |              |                             |              |
| ≥0.5                                     | Reference                   |              | Reference                   |              |
| ≤0.25                                    | 2.001 (0.815-4.914)         | 0.130        | 2.545 (0.587-11.031)        | 0.212        |
| Macrolide resistance                     |                             |              |                             |              |
| Resistant                                | Reference                   |              | Reference                   |              |
| Inducible resistance                     | 1.665 (0.430-6.440)         | 0.460        | 2.775 (0.332-23.160)        | 0.346        |
| <b>Susceptible</b>                       | <b>4.582 (1.287-16.312)</b> | <b>0.019</b> | <b>7.515 (1.164-48.512)</b> | <b>0.034</b> |
| Intravenous amikacin use, days           | 0.983 (0.958-1.009)         | 0.195        | 0.874 (0.938-1.011)         | 0.163        |
| Elevated erythrocyte sedimentation rate* | 0.481 (0.112-2.061)         | 0.324        | 0.896 (0.173-4.638)         | 0.896        |

HR: hazard ratio; CI: confidential interval; MAC: *Mycobacterium avium* complex; MIC: minimum inhibitory concentration.

\*Erythrocyte sedimentation rate &gt;15 mm/h (men) or &gt;20 mm/h (women).
